# Supplementary material for: Inuit Country Food and Health during Pregnancy and Early Childhood in the Circumpolar North: A Scoping Review
Source: PubMed Central journal article supplement (PMC7967653; doi:10.3390/ijerph18052625), 2021-03-05
Supplement: ijerph-18-02625-s001.pdf [file ijerph-18-02625-s001.pdf]

**Table S1.** Articles included in the review “Inuit country food and health during pregnancy and early childhood in the Circumpolar North: a scoping review”.

| Reference                                                                                                                                                                                 | Publication Year | Region                           | Theme                                 |
|-------------------------------------------------------------------------------------------------------------------------------------------------------------------------------------------|------------------|----------------------------------|---------------------------------------|
| Chan et al. (1995) Assessment of dietary exposure to trace metals in Baffin Inuit food. <i>Environmental Health Perspectives</i> , 103(7-8): 740                                          | 1995             | Nunavut                          | Contaminants                          |
| Young (1995) The population survey as a tool for assessing family health in the Keewatin region, NWT, Canada. <i>Arctic Medical Research</i> , 54 Suppl 1: 77                             | 1995             | Nunavut                          | Diet & Nutrition<br>Nutrient Adequacy |
| Kuhnlein et al. (1996) Dietary nutrient profiles of Canadian Baffin Island Inuit differ by food source, season, and age. <i>Journal of the American Dietetic Association</i> , 96(2): 155 | 1996             | Nunavut                          | Diet & Nutrition<br>Nutrient Adequacy |
| Lawn et al. (1998) Food consumption patterns of Inuit women. <i>International Journal of Circumpolar Health</i> , 57 Suppl 1: 198                                                         | 1998             | Nunavut<br>Nunatsiavut           | Diet & Nutrition<br>Nutrient Adequacy |
| G Muckle, E Dewailly, P Ayotte (1998). Prenatal exposure of Canadian children to polychlorinated biphenyls and mercury. <i>Canadian Journal of Public Health</i> , 89 Suppl 1: S20        | 1998             | Nunavut<br>Nunavik<br>Inuvialuit | Contaminants                          |
| Deutch et al. (1999) High blood levels of persistent organic pollutants are statistically correlated with smoking. <i>International Journal of Circumpolar Health</i> , 58(3): 214        | 1999             | Greenland                        | Contaminants                          |
| Waiters et al. (1999) Perinatal vitamin D and calcium status of northern Canadian mothers and their newborn infants. <i>Journal of the American College of Nutrition</i> , 18(2): 122     | 1998             | Inuvialuit                       | Nutrient Adequacy                     |
| Berti et al. (1999) Food use and nutrient adequacy in Baffin Inuit children and adolescents. <i>Canadian Journal of Dietetic Practice and Research</i> , 60(2): 63                        | 1999             | Nunavut                          | Diet & Nutrition<br>Nutrient Adequacy |
| Deutch et al. (2000) High human plasma levels of organochlorine compounds in Greenland. Regional differences and lifestyle effects. <i>Danish Medical Bulletin</i> , 47(2): 132           | 2000             | Greenland                        | Contaminants                          |
| Bjerregaard et al. (2000) Organochlorines and heavy metals in pregnant women from the Disko Bay area in Greenland. <i>Science of the Total Environment</i> , 245(1/3): 195                | 2000             | Greenland                        | Contaminants                          |
| Willows et al. (2000) Anemia and iron status in Inuit infants from northern Quebec. <i>Canadian Journal of Public Health</i> , 91(6): 407                                                 | 2000             | Nunavik                          | Nutrient Adequacy                     |

|                                                                                                                                                                                                                                                |      |                                                     |                                       |
|------------------------------------------------------------------------------------------------------------------------------------------------------------------------------------------------------------------------------------------------|------|-----------------------------------------------------|---------------------------------------|
| Serhir et al. (2001) Outbreak of trichinellosis associated with arctic walrus in Northern Canada, 1999. <i>Canada Communicable Disease Report</i> , 27(4): 31                                                                                  | 2001 | Nunavut                                             | Zoonoses                              |
| Muckle et al. (2001) Determinants of polychlorinated biphenyls and methylmercury exposure in Inuit women of childbearing age. <i>Environmental Health Perspectives</i> , 109(9): 957                                                           | 2001 | Nunavik                                             | Contaminants                          |
| Muckle et al. (2001) Prenatal exposure of the Northern Québec Inuit infants to environmental contaminants. <i>Environmental Health Perspectives</i> , 109(12): 1291                                                                            | 2001 | Nunavik                                             | Contaminants                          |
| Levesque et al. (2003) Monitoring of umbilical cord blood lead levels and sources assessment among the Inuit. <i>Occupational and Environmental Medicine</i> , 60(9): 693                                                                      | 2003 | Nunavik                                             | Contaminants                          |
| Dallaire et al. (2003) Time trends of persistent organic pollutants and heavy metals in umbilical cord blood of Inuit infants born in Nunavik (Québec, Canada) between 1994 and 2001. <i>Environmental Health Perspectives</i> , 111(13): 1660 | 2003 | Nunavik                                             | Contaminants                          |
| Ayotte et al. (2003) Assessment of pre- and postnatal exposure to polychlorinated biphenyls: lessons from the Inuit cohort study. <i>Environmental Health Perspectives</i> , 111(9): 1253                                                      | 2003 | Nunavik                                             | Contaminants                          |
| Dudarev et al. (2004) Blood concentrations of persistent toxic substances in the Indigenous communities of the Russian Arctic. <i>International Journal of Circumpolar Health</i> , 63 Suppl 2, 179                                            | 2003 | Russia                                              | Contaminants                          |
| Arbour et al. (2004) Heart defects and other malformations in the Inuit in Canada: a baseline study. <i>International Journal of Circumpolar Health</i> , 63(3): 251                                                                           | 2004 | Nunavut<br>Nunavik                                  | Nutrient Adequacy                     |
| Van Oostdam et al. (2004) Circumpolar maternal blood contaminant survey, 1994-1997 organochlorine compounds. <i>Science of the Total Environment</i> , 330(1-3): 55                                                                            | 2004 | Greenland<br>Nunavut<br>Nunavik<br>Alaska<br>Russia | Contaminants                          |
| Lucas et al. (2004) Gestational age and birth weight in relation to n-3 fatty acids among Inuit (Canada). <i>Lipids</i> , 39(7): 617                                                                                                           | 2004 | Nunavik                                             | Contaminants<br>Nutrient Adequacy     |
| Christofides et al. (2005) Iron deficiency and anemia prevalence and associated etiologic risk factors in First Nations and Inuit communities in                                                                                               | 2005 | Nunavut                                             | Diet & Nutrition<br>Nutrient Adequacy |

|                                                                                                                                                                                                                                           |      |                                      |                                       |
|-------------------------------------------------------------------------------------------------------------------------------------------------------------------------------------------------------------------------------------------|------|--------------------------------------|---------------------------------------|
| Northern Ontario and Nunavut. <i>Canadian Journal of Public Health</i> , 96(4): 304                                                                                                                                                       |      |                                      |                                       |
| Møller et al. (2005) Outbreak of trichinellosis associated with consumption of game meat in West Greenland. <i>Veterinary Parasitology</i> , 132(1/2): 131                                                                                | 2005 | Greenland                            | Zoonoses                              |
| Saint-Amour et al. (2006) Alterations of visual evoked potentials in preschool Inuit children exposed to methylmercury and polychlorinated biphenyls from a marine diet. <i>Neurotoxicology</i> , 27(4): 567                              | 2006 | Nunavik                              | Contaminants                          |
| Butler Walker et al. (2006) Maternal and umbilical cord blood levels of mercury, lead, cadmium, and essential trace elements in Arctic Canada. <i>Environmental Research</i> , 100(3): 295                                                | 2006 | Nunavut<br>Inuvialuit                | Contaminants                          |
| Berti et al. (2008) Dietary assessment of Indigenous Canadian Arctic women with a focus on pregnancy and lactation. <i>International Journal of Circumpolar Health</i> , 67(4): 349                                                       | 2008 | Nunavut<br>Nunatsiavut<br>Inuvialuit | Diet & Nutrition<br>Nutrient Adequacy |
| Gessner (2009) Geographic and racial patterns of anemia prevalence among low-income Alaskan children and pregnant or postpartum women limit potential etiologies. <i>Journal of Pediatric Gastroenterology and Nutrition</i> , 48(4): 475 | 2009 | Alaska                               | Nutrient Adequacy                     |
| El Hayek et al. (2010) Vitamin D status of Inuit preschoolers reflects season and vitamin D intake. <i>The Journal of Nutrition</i> , 140(10): 1839                                                                                       | 2010 | Nunavut                              | Nutrient Adequacy                     |
| Galloway et al. (2010) Emerging obesity among preschool-aged Canadian Inuit children: results from the Nunavut Inuit Child Health Survey. <i>International Journal of Circumpolar Health</i> , 69(2): 151                                 | 2010 | Nunavut                              | Diet & Nutrition                      |
| Boucher et al (2010) Prenatal exposure to methylmercury and PCBs affects distinct stages of information processing: an event-related potential study with Inuit children. <i>Neurotoxicology</i> , 31(4): 373                             | 2010 | Nunavik                              | Contaminants                          |
| Egeland et al. (2010) Food insecurity among Inuit preschoolers: Nunavut Inuit Child Health Survey, 2007-2008. <i>Canadian Medical Association Journal</i> , 182(3): 243                                                                   | 2010 | Nunavut                              | Food Security                         |
| Egeland et al. (2010) Cultural, socioeconomic, and health indicators among Inuit preschoolers: Nunavut Inuit Child Health Survey, 2007-2008. <i>Rural and Remote Health</i> , 10(2): 1365                                                 | 2010 | Nunavut                              | Food Security<br>Diet & Nutrition     |

|                                                                                                                                                                                                                                      |      |         |                                       |
|--------------------------------------------------------------------------------------------------------------------------------------------------------------------------------------------------------------------------------------|------|---------|---------------------------------------|
| Pacey et al. (2010) Prevalence and risk factors for parental-reported oral health of Inuit preschoolers: Nunavut Inuit Child Health Survey, 2007-2008. <i>Rural and Remote Health</i> , 10(2): 1368                                  | 2010 | Nunavut | Diet & Nutrition<br>Nutrient Adequacy |
| Johnson-Down et al. (2010) Adequate nutrient intakes are associated with traditional food consumption in Nunavut Inuit children aged 3-5 years. <i>Journal of Nutrition</i> , 140(7): 1311                                           | 2010 | Nunavut | Diet & Nutrition<br>Nutrient Adequacy |
| El-Hayek et al. (2010) Vitamin D status of Inuit preschoolers reflects season and vitamin D intake. <i>Journal of Nutrition</i> , 140(10): 1839                                                                                      | 2010 | Nunavut | Nutrient Adequacy                     |
| Egeland et al. (2011) Traditional food and monetary access to market-food: correlates of food insecurity among Inuit preschoolers. <i>International Journal of Circumpolar Health</i> , 70(4): 373                                   | 2011 | Nunavut | Food Security<br>Nutrient Adequacy    |
| Boucher (2011) Neurophysiologic and neurobehavioral evidence of beneficial effects of prenatal omega-3 fatty acid intake on memory function at school age. <i>American Journal of Clinical Nutrition</i> , 93(5): 1025               | 2011 | Nunavik | Contaminants                          |
| WenJing et al. (2011) Mercury hair concentrations and dietary exposure among Inuit preschool children in Nunavut, Canada. <i>Environment International</i> , 37(1): 42                                                               | 2011 | Nunavut | Contaminants                          |
| Ethier et al. (2012) Effects of environmental contaminant exposure on visual brain development: a prospective electrophysiological study in school-aged children. <i>Neurotoxicology</i> , 33(5): 1075                               | 2012 | Nunavik | Contaminants                          |
| El Hayek et al. (2012) Higher body mass, older age and higher monounsaturated fatty acids intake reflect better quantitative ultrasound parameters in Inuit preschoolers <i>International Journal of Circumpolar Health</i> , 71     | 2012 | Nunavut | Nutrient Adequacy                     |
| Gagne et al. (2012) Traditional food consumption is associated with higher nutrient intakes in Inuit children attending childcare centres in Nunavik. <i>International Journal of Circumpolar Health</i> , 71(1): 18401              | 2012 | Nunavik | Diet & Nutrition<br>Nutrient Adequacy |
| Boucher et al. (2012) Response inhibition and error monitoring during a visual go/no-go task in Inuit children exposed to lead, polychlorinated biphenyls, and methylmercury. <i>Environmental Health Perspectives</i> , 120(4): 608 | 2012 | Nunavik | Contaminants                          |
| Boucher et al. (2012) Prenatal methylmercury, postnatal lead exposure, and evidence of attention deficit/hyperactivity disorder among Inuit                                                                                          | 2012 | Nunavik | Contaminants                          |

|                                                                                                                                                                                                                                              |      |                                                 |                                       |
|----------------------------------------------------------------------------------------------------------------------------------------------------------------------------------------------------------------------------------------------|------|-------------------------------------------------|---------------------------------------|
| children in Arctic Québec. <i>Environmental Health Perspectives</i> , 120(10): 1456                                                                                                                                                          |      |                                                 |                                       |
| Langlois et al. (2013) Dietary habits of Aboriginal children. <i>Health reports</i> , 24(4): 3                                                                                                                                               | 2013 | Nunavut<br>Nunavik<br>Nunatsiavut<br>Inuvialuit | Diet & Nutrition<br>Nutrient Adequacy |
| Findlay et al. (2013) Hunger among Inuit children in Canada. <i>International Journal of Circumpolar Health</i> , 72                                                                                                                         | 2013 | Nunavut<br>Nunavik<br>Nunatsiavut<br>Inuvialuit | Food Security                         |
| Dallaire et al. (2013) Exposure to organochlorines and mercury through fish and marine mammal consumption: associations with growth and duration of gestation among Inuit newborns. <i>Environment International</i> , 54, 85                | 2013 | Nunavik                                         | Contaminants                          |
| Gagne et al. (2013) Consumption of tomato products is associated with lower blood mercury levels in Inuit preschool children. <i>Food and Chemical Toxicology</i> , 51: 404                                                                  | 2013 | Nunavik                                         | Contaminants                          |
| Jensen et al. (2013) Tobacco smoke increases the risk of otitis media among Greenlandic Inuit children while exposure to organochlorines remain insignificant. <i>Environment International</i> , 54: 112                                    | 2013 | Greenland                                       | Contaminants                          |
| Blanchet et al. (2014) Usual dietary fatty acid intakes and red-blood-cell membrane fatty acid composition in Inuit children attending child-care centres in Nunavik, northern Québec, Canada. <i>Public Health Nutrition</i> , 17(12): 2844 | 2014 | Nunavik                                         | Diet & Nutrition<br>Nutrient Adequacy |
| McIsaac et al. (2014) Exclusive breastfeeding among Canadian Inuit results from the Nunavut Inuit Child Health Survey. <i>Journal of Human Lactation</i> , 30(2): 229                                                                        | 2014 | Nunavut                                         | Diet & Nutrition                      |
| Fillion et al. (2014) Identification of environmental sources of lead exposure in Nunavut (Canada) using stable isotope analyses. <i>Environment International</i> , 71, 63                                                                  | 2014 | Nunavut                                         | Contaminants                          |
| Curren et al. (2014) Comparing plasma concentrations of persistent organic pollutants and metals in primiparous women from northern and southern Canada. <i>Science of the Total Environment</i> , 306                                       | 2014 | Nunavut                                         | Contaminants                          |

|                                                                                                                                                                                                                                 |      |                       |                                                       |
|---------------------------------------------------------------------------------------------------------------------------------------------------------------------------------------------------------------------------------|------|-----------------------|-------------------------------------------------------|
| O'Brien et al. (2014) Effect of dietary calcium intake on lead exposure in Inuit children attending childcare centres in Nunavik. <i>International Journal of Environmental Health Research</i> , 24(5): 482                    | 2014 | Nunavik               | Contaminants<br>Diet & Nutrition<br>Nutrient Adequacy |
| Macdonald et al. (2014) Understanding healthy pregnancies: the perspective of Inuit midwives in northwestern Quebec. <i>Canadian Journal of Rural Medicine</i> , 19(4): 128                                                     | 2014 | Nunavik               | Food Security<br>Diet & Nutrition                     |
| Singer et al. (2014) Food consumption, obesity and abnormal glycaemic control in a Canadian Inuit community. <i>Clinical Obesity</i> , 4(6): 316                                                                                | 2014 | Nunavut               | Diet & Nutrition<br>Nutrient Adequacy                 |
| McIsaac et al. (2015) Prevalence and Characteristics Associated with Breastfeeding Initiation Among Canadian Inuit from the 2007-2008 Nunavut Inuit Child Health Survey. <i>Maternal and Child Health Journal</i> , 19(9): 2003 | 2015 | Nunavut               | Food Security<br>Diet & Nutrition                     |
| Hedinsdottir Hammer et al. (2015). Fatal outbreak of botulism in Greenland. <i>Infectious Diseases</i> , 47(3): 190                                                                                                             | 2015 | Greenland             | Zoonoses                                              |
| Curren et al. (2015) Assessing determinants of maternal blood concentrations for persistent organic pollutants and metals in the eastern and western Canadian Arctic. <i>Science of the Total Environment</i> , 150             | 2015 | Nunavut<br>Inuvialuit | Contaminants                                          |
| Knudsen et al (2015) Lifestyle, reproductive factors and food intake in Greenlandic pregnant women: the ACCEPT - sub-study. <i>International Journal of Circumpolar Health</i> , 74, 29469                                      | 2015 | Greenland             | Diet & Nutrition<br>Nutrient Adequacy                 |
| Long (2015) Food intake and serum persistent organic pollutants in the Greenlandic pregnant women: the ACCEPT sub-study. <i>Science of the Total Environment</i> , 529, 198                                                     | 2015 | Greenland             | Contaminants                                          |
| Binnington et al. (2016). Mechanistic polychlorinated biphenyl exposure modeling of mothers in the Canadian Arctic: the challenge of reliably establishing dietary composition. <i>Environment International</i> , 92-93, 256   | 2016 | Nunavut<br>Inuvialuit | Contaminants                                          |
| Gautier et al. (2016) Assessment of the implementation fidelity of the Arctic Char Distribution Project in Nunavik, Quebec. <i>BMJ Global Health</i> , 1(3): e000093                                                            | 2016 | Nunavik               | Contaminants<br>Food Security<br>Nutrient Adequacy    |
| Maurice et al. (2017) Yup'ik identity and socioeconomic status are associated with child consumption of traditional food and weight in rural Yup'ik communities. <i>Ethnicity &amp; Health</i> , 1-11                           | 2017 | Alaska                | Food Security<br>Diet & Nutrition                     |
| McIsaac et al. (2017) Household food security and breast-feeding duration among Canadian Inuit. <i>Public Health Nutrition</i> , 20(1): 64                                                                                      | 2017 | Nunavut               | Food Security                                         |

|                                                                                                                                                                                                                                          |      |                                      |                                       |
|------------------------------------------------------------------------------------------------------------------------------------------------------------------------------------------------------------------------------------------|------|--------------------------------------|---------------------------------------|
| Huet et al. (2017) Food insecurity and food consumption by season in households with children in an Arctic city: a cross-sectional study. <i>BMC Public Health</i> , 17(578)                                                             | 2017 | Nunavut                              | Food Security                         |
| Terkelsen (2018) Reproductive factors, lifestyle and dietary habits among pregnant women in Greenland: The ACCEPT sub-study 2013-2015. <i>Scandinavian Journal of Public Health</i> , 46(2): 252                                         | 2018 | Greenland                            | Diet & Nutrition<br>Nutrient Adequacy |
| Rasmussen et al. (2019) Greenlandic women's lifestyle and diet during pregnancy and child risk for asthma, eczema and allergy: an ACCEPT-sub-study. <i>International Journal of Circumpolar Health</i> , 78(1): 1682421                  | 2019 | Greenland                            | Contaminants<br>Diet & Nutrition      |
| Rasmussen et al. (2019) Greenlandic women's lifestyle and diet during pregnancy and child risk for asthma, eczema and allergy: an ACCEPT-sub-study. <i>International Journal of Circumpolar Health</i> , 78(1): 1682421                  | 2019 | Greenland                            | Diet & Nutrition                      |
| Timmermann et al. (2019) Environmental chemical exposures among Greenlandic children in relation to diet and residence. <i>International Journal of Circumpolar Health</i> , 78(1): 1642090                                              | 2019 | Greenland                            | Contaminants                          |
| Courraud et al. (2019) Dietary habits, metabolic health and vitamin D status in Greenlandic children. <i>Public Health Nutrition</i> , 23(5): 904                                                                                        | 2019 | Greenland                            | Diet & Nutrition<br>Nutrient Adequacy |
| Bank-Nielsen et al. (2019) Pregnant Inuit Women's Exposure to Metals and Association with Fetal Growth Outcomes: ACCEPT 2010-2015. <i>International Journal of Environmental Research and Public Health</i> , 16(7)                      | 2019 | Greenland                            | Contaminants                          |
| Adamou et al. (2018) Socio-economic inequalities in blood mercury (Hg) and serum polychlorinated biphenyl (PCB) concentrations among pregnant Inuit women from Nunavik, Canada. <i>Canadian Journal of Public Health</i> , 109(5-6): 671 | 2018 | Nunavik                              | Contaminants                          |
| Turgeon et al. (2019) Temporal trends of legacy and emerging persistent organic pollutants in Inuit preschoolers from Northern Quebec (Canada). <i>International Journal of Environmental Health Research</i> , 29(6): 643               | 2019 | Nunavik                              | Contaminants                          |
| El Hayek et al. (2018) Vitamin D status and intake of lactating Inuit women living in the Canadian Arctic. <i>Public Health Nutrition</i> , 21(11): 1988                                                                                 | 2018 | Nunavut<br>Nunatsiavut<br>Inuvialuit | Nutrient Adequacy                     |
